# Supplementary material for: LY3009120, a panRAF inhibitor, has significant anti-tumor activity in BRAF and KRAS mutant preclinical models of colorectal cancer
Source: PubMed Central journal article supplement (PMC5354729; doi:10.18632/oncotarget.14002), 2016-12-16
Supplement: oncotarget-08-9251-s001.pdf [file oncotarget-08-9251-s001.pdf]

# LY3009120, a panRAF inhibitor, has significant anti-tumor activity in BRAF and KRAS mutant preclinical models of colorectal cancer

## Supplementary Materials

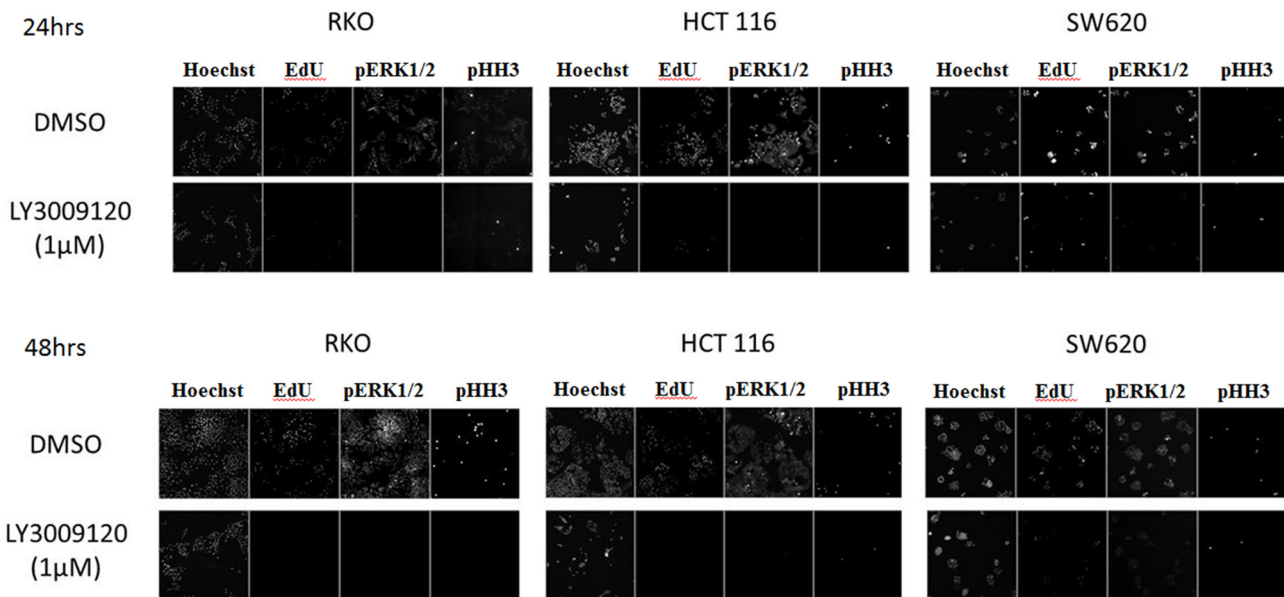

Supplementary Figure S1: *BRAF*<sup>mut</sup> (RKO) or *KRAS*<sup>mut</sup> (HCT 116 and SW620) CRC cell lines were treated with 1 µM LY3009120 or DMSO control, fixed at 24 or 48 hrs and stained for immunofluorescence with Hoechst stain (nuclei), Click-iT<sup>®</sup> EdU and immunofluorescent antibodies against pERK1/2 T202/Y204 and pHH3 S10 as indicated.

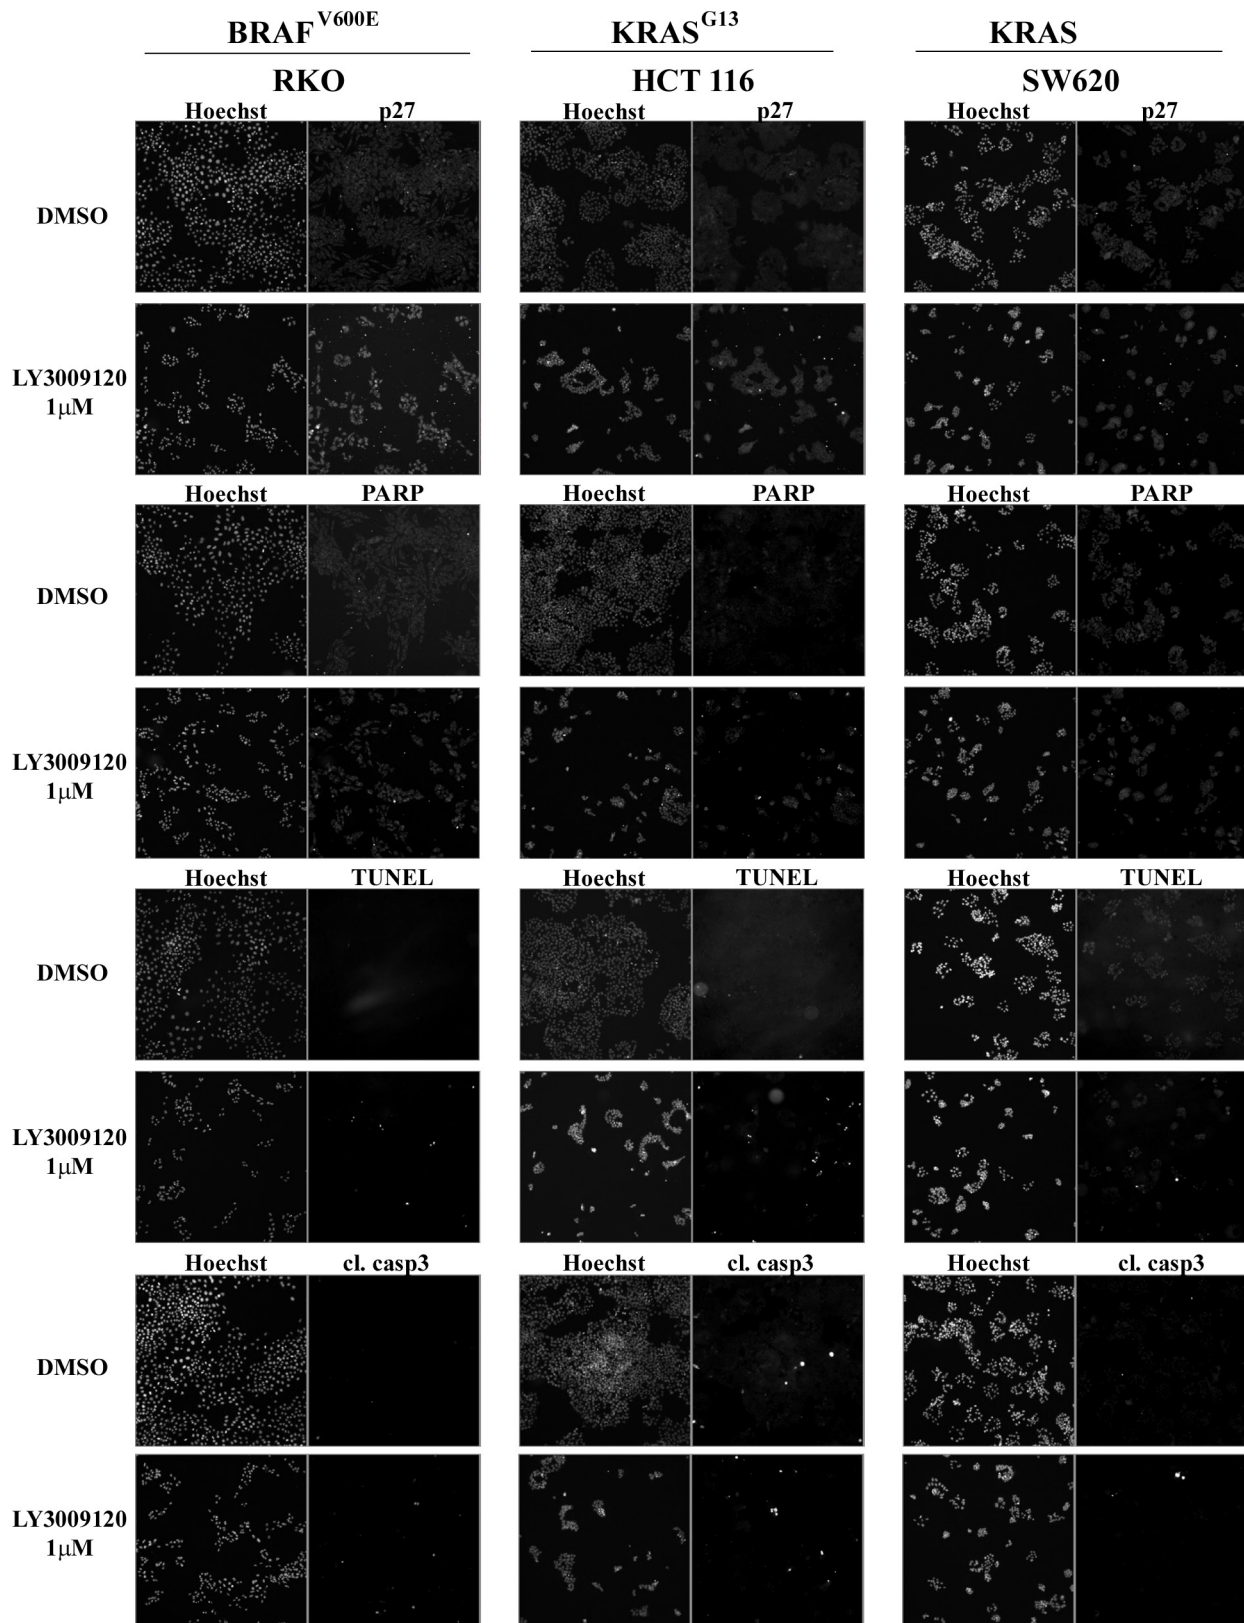

**Supplementary Figure S2: Cells were treated with 1 μM LY3009120 or DMSO control and fixed at 48 hrs post-treatment. Cells were stained for immunofluorescence analysis with Hoechst stain and antibodies against the proteins indicated.**

**Supplementary Table S1: Cell culture media of the CRC cell lines used**

| Cell line   | Cell Culture Medium |
|-------------|---------------------|
| Colo 205    | RPMI + 10% FBS      |
| HT-29       | RPMI + 10% FBS      |
| RKO         | DMEM + 10% FBS      |
| HCT-15      | DMEM + 10% FBS      |
| DLD-1       | RPMI + 10% FBS      |
| HCT 116     | McCoy's + 10% FBS   |
| HKH2        | McCoy's + 10% FBS   |
| LoVo        | MEM + 10% FBS       |
| SW480       | DMEM + 10% FBS      |
| SW620       | DMEM + 10% FBS      |
| SW837       | DMEM + 10% FBS      |
| Colo 320HSR | RPMI + 10% FBS      |
| SNU-C1      | RPMI + 10% FBS      |
| NCI-H716    | RPMI + 10% FBS      |
| SW48        | DMEM + 10% FBS      |

**Supplementary Table S2: Statistical analysis of the effects of siRNA-mediated knockdown on the proliferation of HCT 116 cells**

| Cell Line | siRNA Knock Down | vs. siRNA Knock Down | Difference | p-Value |
|-----------|------------------|----------------------|------------|---------|
| HCT 116   | ctrl             | A                    | 18.50425   | 0.1545  |
| HCT 116   | ctrl             | AB                   | 16.87784   | 0.2488  |
| HCT 116   | ctrl             | AC                   | 29.2205    | 0.0017  |
| HCT 116   | ctrl             | BC                   | 33.50357   | 0.0002  |
| HCT 116   | ctrl             | ABC                  | 64.74037   | <.0001  |
| HCT 116   | A                | AC                   | 10.71625   | 0.7883  |
| HCT 116   | A                | BC                   | 14.99932   | 0.396   |
| HCT 116   | A                | ABC                  | 46.23612   | <.0001  |
| HCT 116   | B                | ctrl                 | 18.27666   | 0.1658  |
| HCT 116   | B                | A                    | 36.78091   | <.0001  |
| HCT 116   | B                | C                    | 1.43862    | 1       |
| HCT 116   | B                | AB                   | 35.1545    | <.0001  |
| HCT 116   | B                | AC                   | 47.49717   | <.0001  |
| HCT 116   | B                | BC                   | 51.78023   | <.0001  |
| HCT 116   | B                | ABC                  | 83.01703   | <.0001  |
| HCT 116   | C                | ctrl                 | 16.83804   | 0.2515  |
| HCT 116   | C                | A                    | 35.34229   | <.0001  |
| HCT 116   | C                | AB                   | 33.71588   | 0.0002  |
| HCT 116   | C                | AC                   | 46.05854   | <.0001  |
| HCT 116   | C                | BC                   | 50.34161   | <.0001  |
| HCT 116   | C                | ABC                  | 81.57841   | <.0001  |
| HCT 116   | AB               | A                    | 1.62641    | 1       |
| HCT 116   | AB               | AC                   | 12.34266   | 0.6456  |
| HCT 116   | AB               | BC                   | 16.62573   | 0.2662  |
| HCT 116   | AB               | ABC                  | 47.86253   | <.0001  |
| HCT 116   | AC               | BC                   | 4.28307    | 0.9986  |
| HCT 116   | AC               | ABC                  | 35.51987   | <.0001  |
| HCT 116   | BC               | ABC                  | 31.2368    | 0.0006  |

**Supplementary Table S3: Statistical analysis of the effects of siRNA-mediated knockdown on the proliferation of SW620 cells**

| Cell Line | siRNA Knock Down | vs. siRNA Knock Down | Difference | <i>p</i> -Value |
|-----------|------------------|----------------------|------------|-----------------|
| SW620     | ctrl             | A                    | 0.66995    | 1               |
| SW620     | ctrl             | AB                   | 11.32169   | 0.3612          |
| SW620     | ctrl             | AC                   | 14.01361   | 0.1291          |
| SW620     | ctrl             | BC                   | 18.04881   | 0.0157          |
| SW620     | ctrl             | ABC                  | 48.02203   | <.0001          |
| SW620     | A                | AB                   | 10.65174   | 0.4416          |
| SW620     | A                | AC                   | 13.34366   | 0.1721          |
| SW620     | A                | BC                   | 17.37887   | 0.0232          |
| SW620     | A                | ABC                  | 47.35208   | <.0001          |
| SW620     | B                | ctrl                 | 8.66138    | 0.6973          |
| SW620     | B                | A                    | 9.33132    | 0.6122          |
| SW620     | B                | AB                   | 19.98307   | 0.0047          |
| SW620     | B                | AC                   | 22.67498   | 0.0008          |
| SW620     | B                | BC                   | 26.71019   | <.0001          |
| SW620     | B                | ABC                  | 56.6834    | <.0001          |
| SW620     | C                | ctrl                 | 11.58822   | 0.3314          |
| SW620     | C                | A                    | 12.25817   | 0.2626          |
| SW620     | C                | B                    | 2.92685    | 0.9991          |
| SW620     | C                | AB                   | 22.90991   | 0.0006          |
| SW620     | C                | AC                   | 25.60183   | <.0001          |
| SW620     | C                | BC                   | 29.63704   | <.0001          |
| SW620     | C                | ABC                  | 59.61025   | <.0001          |
| SW620     | AB               | AC                   | 2.69192    | 0.9995          |
| SW620     | AB               | BC                   | 6.72712    | 0.8935          |
| SW620     | AB               | ABC                  | 36.70034   | <.0001          |
| SW620     | AC               | BC                   | 4.03521    | 0.9935          |
| SW620     | AC               | ABC                  | 34.00842   | <.0001          |
| SW620     | BC               | ABC                  | 29.97321   | <.0001          |

**Supplementary Table S4: Statistical analysis of the effects of siRNA-mediated knockdown on the proliferation of RKO cells**

| Cell Line | siRNA Knock Down | vs. siRNA Knock Down | Difference | <i>p</i> -Value |
|-----------|------------------|----------------------|------------|-----------------|
| RKO       | ctrl             | A                    | 11.04178   | 0.5907          |
| RKO       | ctrl             | B                    | 30.9041    | <.0001          |
| RKO       | ctrl             | AB                   | 45.82386   | <.0001          |
| RKO       | ctrl             | AC                   | 12.50319   | 0.429           |
| RKO       | ctrl             | BC                   | 27.00062   | 0.0005          |
| RKO       | ctrl             | ABC                  | 49.94463   | <.0001          |
| RKO       | A                | B                    | 19.86233   | 0.0274          |
| RKO       | A                | AB                   | 34.78208   | <.0001          |
| RKO       | A                | AC                   | 1.46142    | 1               |
| RKO       | A                | BC                   | 15.95884   | 0.1465          |
| RKO       | A                | ABC                  | 38.90285   | <.0001          |
| RKO       | B                | AB                   | 14.91975   | 0.2116          |
| RKO       | B                | ABC                  | 19.04053   | 0.0404          |
| RKO       | C                | ctrl                 | 0.48766    | 1               |
| RKO       | C                | A                    | 11.52944   | 0.5359          |
| RKO       | C                | B                    | 31.39176   | <.0001          |
| RKO       | C                | AB                   | 46.31152   | <.0001          |
| RKO       | C                | AC                   | 12.99085   | 0.3786          |
| RKO       | C                | BC                   | 27.48828   | 0.0004          |
| RKO       | C                | ABC                  | 50.43229   | <.0001          |
| RKO       | AB               | ABC                  | 4.12077    | 0.9971          |
| RKO       | AC               | B                    | 18.40091   | 0.054           |
| RKO       | AC               | AB                   | 33.32066   | <.0001          |
| RKO       | AC               | BC                   | 14.49743   | 0.2431          |
| RKO       | AC               | ABC                  | 37.44144   | <.0001          |
| RKO       | BC               | B                    | 3.90348    | 0.9979          |
| RKO       | BC               | AB                   | 18.82324   | 0.0447          |
| RKO       | BC               | ABC                  | 22.94401   | 0.0055          |
